**Title:**

Intestinal Parasites among Primary School Children in Aden, Yemen

**Authors:**

Ali N. M. Gubran<sup>1</sup>,

Naif Mohammed Al-Haidary<sup>2</sup>,

Marwa Faisal M. Bajubair<sup>3</sup>,

Afrah Mohsen Ali Algibary<sup>3</sup>,

Manal Galeb Mhmad Ali<sup>3</sup>,

Marwa Fuad Othman Ali<sup>3</sup>,

**Affiliations:**

<sup>1</sup>Department of Health Sciences, Faculty of Medicine and Health Sciences, University of Science and Technology, Aden, Yemen.

<sup>2</sup>Department of Medical Microbiology and Immunology, Faculty of Medicine and Health Sciences, Sana'a University, Sana'a, Yemen.

<sup>3</sup>Graduated Students of the Medical Laboratory Program, Department of Health Sciences, Faculty of Medicine and Health Sciences, University of Science and Technology, Aden, Yemen.

**Corresponding Author:**

Naif Mohammed Al-Haidary

E-mail: [alhidary2000@gmail.com](mailto:alhidary2000@gmail.com) ; [n.alhaidary@su.edu.ye](mailto:n.alhaidary@su.edu.ye)

**Running Title:**

Parasites in Aden Schoolchildren

1 **Abstract**

2 **Background:** Intestinal parasite infection is a significant public health problem worldwide. This  
3 study aimed to determine the prevalence of intestinal parasites among primary school children,  
4 identify the most common types of parasites, and identify the risk factors contributing to  
5 infection in Aden, Yemen.

6 **Methodology/Principal Findings:** An analytical cross-sectional study was conducted on 201  
7 school children in Aden, Yemen. Stool specimens were collected and tested using direct methods  
8 (saline and iodine preparations) and sedimentation concentration techniques. Data analysis was  
9 performed using SPSS (Version 21) with  $p \leq 0.05$  considered statistically significant. The overall  
10 prevalence of intestinal parasites was 47.3%; 35.8% had a single parasite and 11.5% had multiple  
11 parasites. Higher rates were observed among female schoolchildren (51.2%), children whose  
12 mothers had primary education (51.3%), secondary education (50%), housewives (48.5%), and  
13 children aged >9 years (50%). The most predominant parasite was *Entamoeba histolytica/dispar*  
14 (36.3%). There was no significant association between the identified risk factors and intestinal  
15 parasitic infections.

16 **Conclusions/Significance:** The prevalence rate of intestinal parasites is high in Aden, Yemen,  
17 with *Entamoeba histolytica/dispar* being the most dominant parasite. The highest rates were  
18 found among female schoolchildren, those whose mothers were housewives with primary or  
19 secondary education, and children aged >9 years.

20

21 **Keywords:** Intestinal parasites, primary school children, Aden, Yemen

22

23 **Author Summary**

24 Intestinal parasite infections are a major health issue in many parts of the world, especially in  
25 developing countries like Yemen. This study investigated the prevalence of these infections  
26 among primary school children in Aden, Yemen. By analyzing stool samples from 201 children,  
27 we found that nearly half were infected with at least one type of parasite. The most common  
28 parasite was *Entamoeba histolytica/dispar*, affecting more than a third of the children. We also  
29 discovered that certain groups of children were more likely to be infected, such as older children,  
30 girls, and those whose mothers had lower levels of education or were housewives. Understanding  
31 these patterns can help in developing targeted interventions to reduce the spread of these  
32 infections and improve children's health and educational outcomes.

33

34

35

36

37

38

39

40

41

42

43

44 **Introduction:**

45 Neglected tropical diseases (NTDs) represent a diverse group of communicable diseases that  
46 prevail in tropical and subtropical conditions in 149 countries, affecting more than one billion  
47 people. Among these, parasitic infections remain a significant public health challenge,  
48 particularly in developing countries where they are often overlooked by public health agendas.  
49 Children are especially vulnerable to these infections due to their developing immune systems,  
50 poor hygiene practices, and frequent contact with contaminated soil and water [1,2].

51 Intestinal parasitic infections, including soil-transmitted helminths (STH) and protozoa, are  
52 widespread in regions with inadequate sanitation and limited access to clean water. These  
53 infections can lead to severe health outcomes, including malnutrition, impaired physical and  
54 cognitive development, and increased susceptibility to other infections. The World Health  
55 Organization (WHO) estimates that more than 267 million preschool-age children and over 568  
56 million school-age children live in areas where these parasites are intensively transmitted [3].

57 Despite their significant impact, parasitic infections are often neglected in terms of research  
58 funding, policy prioritization, and healthcare resources. This neglect is due in part to their  
59 association with poverty and the marginalized populations they predominantly affect.  
60 Consequently, there is a pressing need for comprehensive epidemiological data to inform  
61 targeted interventions and control strategies [4].

62 In Yemen, intestinal parasitic infections among children remain a critical public health issue. The  
63 country's ongoing conflict and resulting humanitarian crisis have exacerbated the conditions that

64 facilitate the transmission of these infections, including displacement, overcrowding, and  
65 deteriorating sanitation infrastructure. Understanding the prevalence and risk factors associated  
66 with intestinal parasitic infections in this context is essential for developing effective public  
67 health interventions [5,6].

68 Different studies have reported varying prevalence rates of intestinal parasitic infections among  
69 children, such as 90% in Al-Mahweet, 51.26% and 27.8% in Taiz, 57.4% in Ibb, and 59% in  
70 Hadhramout [7-10]. However, the prevalence among schoolchildren in the Aden governorate  
71 remains unclear. This study aims to determine the prevalence of intestinal parasites among  
72 primary school children, identify the most common types of parasites, and identify the risk  
73 factors contributing to intestinal parasite infection among these children in Aden, Yemen.

74 By conducting this study, we aim to highlight the burden and determinants of intestinal parasitic  
75 infections in a neglected tropical disease-endemic region, thereby advocating for enhanced  
76 efforts to address this critical public health challenge.

77

## 78 **Materials and Methods**

### 79 **Study Design**

80 An analytical cross-sectional study was conducted on 201 primary school children in Aden,  
81 Yemen, between November 2023 and April 2024. The study included children aged 7 to 15 years  
82 who were randomly selected from 5 primary schools.

### 83 **Study Population and Setting**

84 The study included children aged 7 to 15 years who were randomly selected from 5 primary  
85 schools in Aden, Yemen. Inclusion criteria were all primary school children within the specified  
86 age range who provided stool samples and completed questionnaires. Exclusion criteria were  
87 children with chronic illnesses or those who did not provide consent.

## 88 **Data Collection**

89 Data were collected using a predesigned and pilot-tested questionnaire. The questionnaire  
90 included information on the children's age, sex, education level, and occupation of their mothers,  
91 as well as questions about risk factors contributing to the prevalence of intestinal parasites. The  
92 questionnaire was administered by trained field workers.

## 93 **Ethical Considerations**

94 Ethical approval was obtained from the Ethics Committee of the University of Science and  
95 Technology, Aden, Yemen (MEC No. MEC/AD022). Written informed consent was obtained  
96 from the parents or guardians of all participating children.

## 97 **Sample Collection and Testing**

98 Stool specimens were collected from all participating children using sterile containers. These  
99 specimens were tested using the following methods:

- 100 • **Direct Saline Preparation:** A drop of saline was mixed with a small amount of stool on a  
101 glass slide and examined under a microscope for motile parasites and cysts.
- 102 • **Iodine Preparation:** A drop of iodine was added to a small amount of stool on a glass  
103 slide to stain cysts and ova, making them more visible under a microscope.

- 104 • **Sedimentation Concentration Techniques:** This involved mixing stool with saline,  
105 centrifuging the mixture, and examining the sediment for parasites.

## 106 **Data Analysis**

107 The collected data were analyzed using IBM SPSS Statistics for Windows, version 21.0 (IBM  
108 Corp., Armonk, NY, USA). Descriptive statistics were used to summarize the data. The chi-  
109 square test was applied to determine the association between intestinal parasitic infections and  
110 various risk factors. Logistic regression analysis was performed to identify significant predictors  
111 of infection. A p-value of  $\leq 0.05$  was considered statistically significant.

112

## 113 **Results**

### 114 **Demographics**

115 Out of 201 primary school children, the majority were females (127, 63.2%), with a total median  
116  $\pm$  interquartile range (IQR) age of  $10 \pm 5$  years. The minimum and maximum ages were 7 and 15  
117 years, respectively.

118 Table 1. Age and sex distribution of schoolchildren in Aden, Yemen.

| Age Groups (years) | Male (%)  | Female (%) | Total (%)  |
|--------------------|-----------|------------|------------|
| <9                 | 22 (29.7) | 72 (56.7)  | 94 (46.8)  |
| >9                 | 52 (70.3) | 55 (43.3)  | 107 (53.2) |
| <b>Total</b>       | 74 (36.8) | 127 (63.2) | 201 (100)  |
| Median (years)     | 12        | 9          | 10         |

|                     |    |    |    |
|---------------------|----|----|----|
| Interquartile range | 5  | 6  | 5  |
| IQR (years)         |    |    |    |
| Minimum (years)     | 7  | 7  | 7  |
| maximum (years)     | 15 | 15 | 15 |

119

## 120 **Prevalence of Intestinal Parasites**

121 The overall prevalence of intestinal parasites was 47.3%, with 35.8% having a single parasite  
122 and 11.5% having multiple parasites.

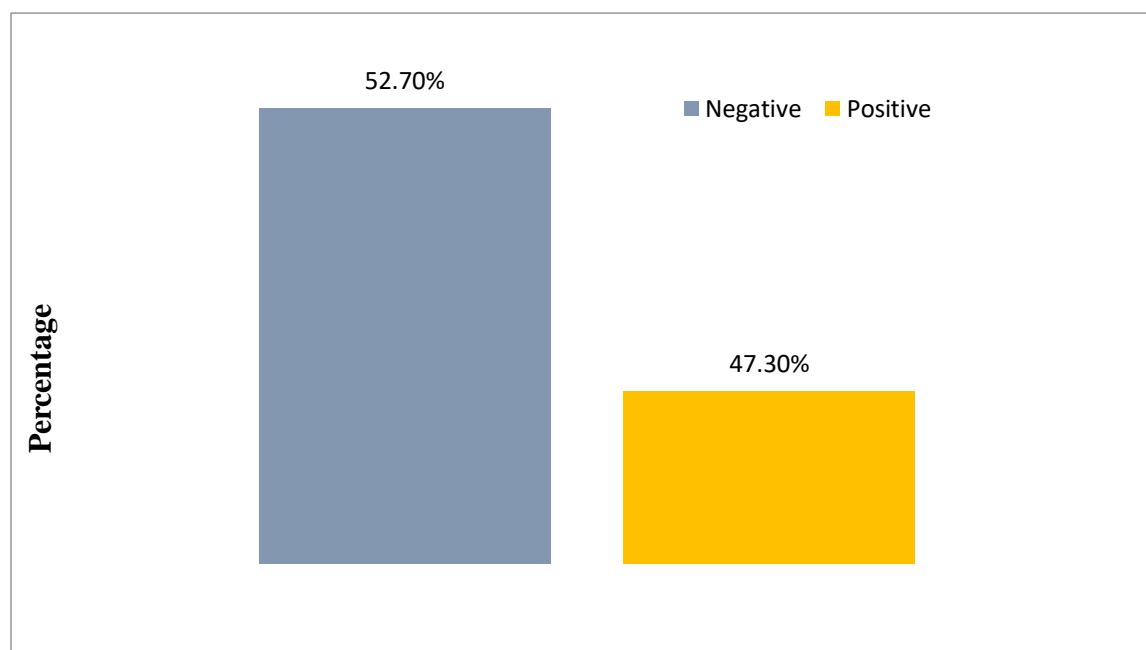

123

124 Figure 1. Prevalence of parasitic infection among primary schoolchildren in Aden, Yemen.

## 125 **Distribution of Intestinal Parasites by Sex**

126 The prevalence rates were higher among female schoolchildren (51.2%) compared to males  
127 (45.5%).



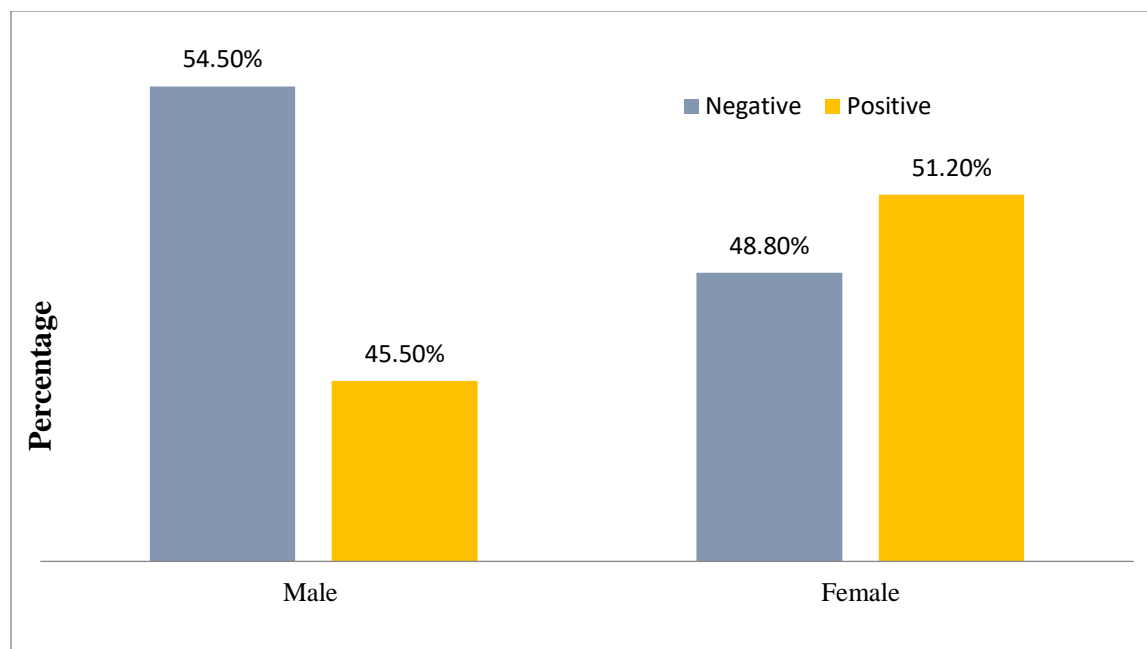

128

129 Figure 2. Prevalence of parasitic infection among primary schoolchildren according to their sex  
130 in Aden, Yemen.

131

### 132 **Distribution of Different Intestinal Parasites**

133 The most predominant parasite identified was *Entamoeba histolytica/dispar*, found in 36.3% of  
134 the cases, followed by *Giardia lamblia* (15.4%), *Hymenolepis nana* (8.5%), and *Enterobius*  
135 *vermicularis* (5.0%).

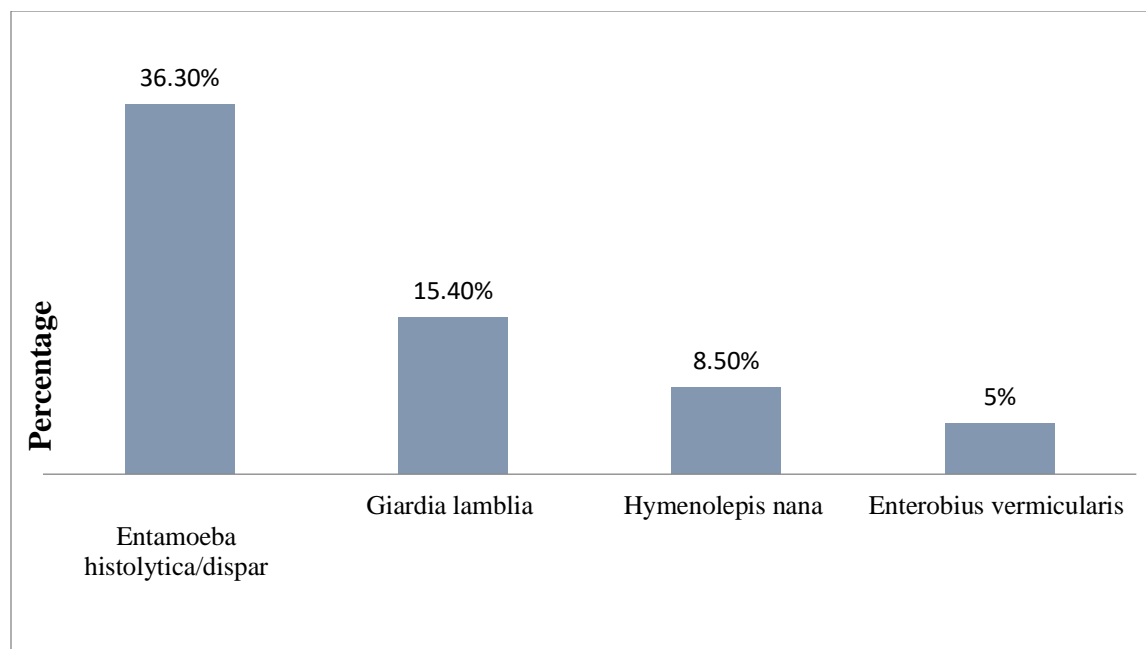

136

137 Figure 3. Distribution of different intestinal parasites detected among primary schoolchildren in  
138 Aden, Yemen.

139

#### 140 **Single vs. Multiple Parasitic Infections**

141 Among the children infected with intestinal parasites, 35.8% had a single parasitic infection,  
142 while 11.5% had multiple parasitic infections.

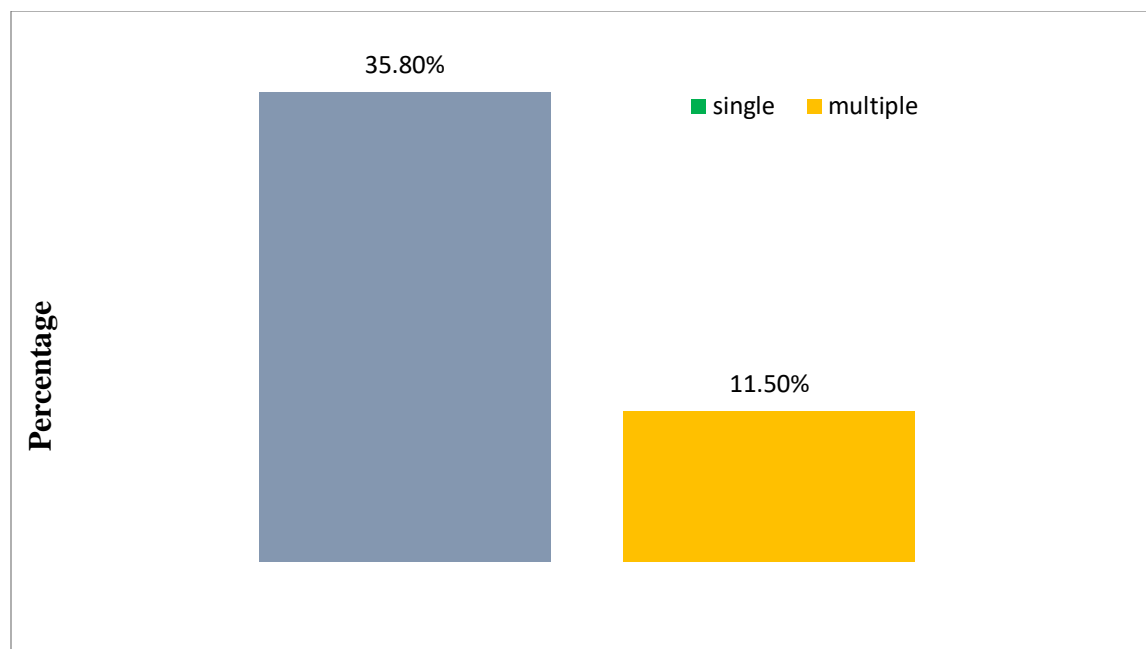

143

144 Figure 4. Presence of single or multiple parasitic infections among primary schoolchildren in  
145 Aden, Yemen.

146 **Prevalence of Protozoa and Helminths**

147 The prevalence of protozoa was 51.7%, while helminths were found in 8.9% of the infected  
148 children.

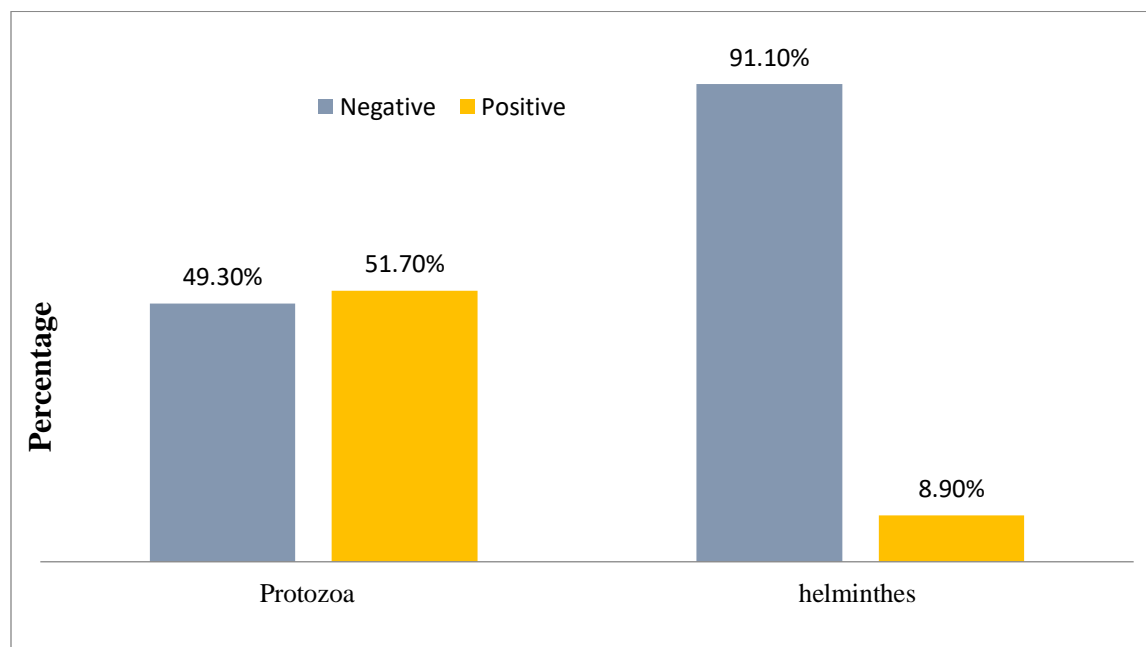

149

150 Figure 5. Prevalence of protozoa and helminths among primary schoolchildren in Aden, Yemen.

### 151 **Distribution of Intestinal Parasites by Maternal Education**

152 The highest prevalence rates were observed among children whose mothers had primary school  
153 education (51.3%), followed by those whose mothers had secondary school education (50%).

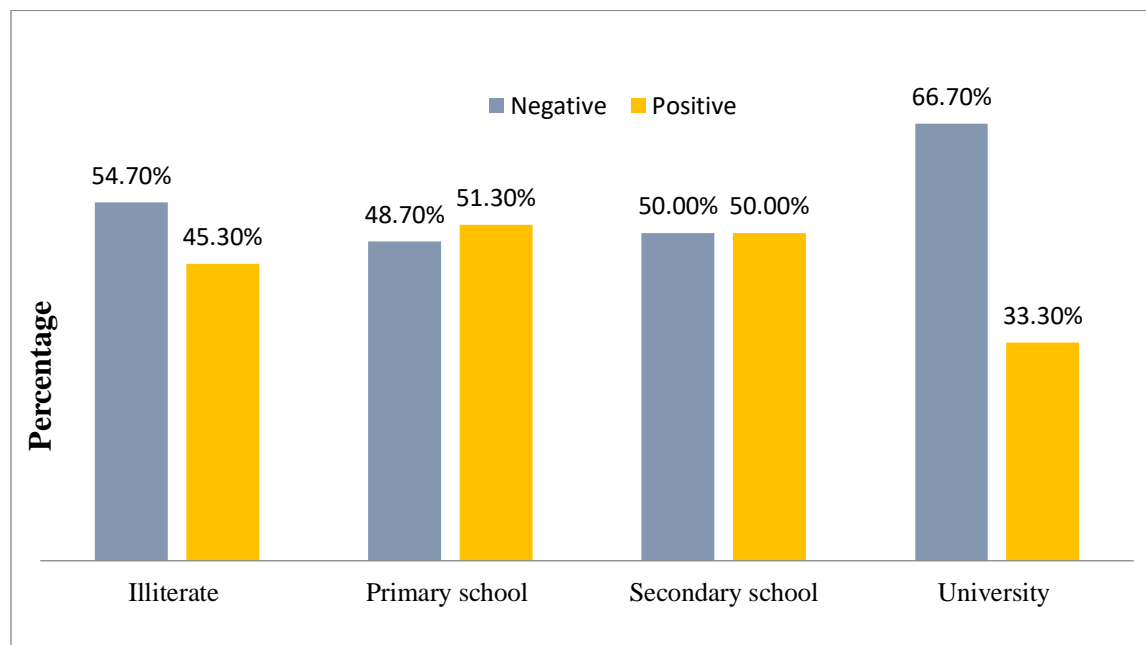

154  
155 Figure 6. Prevalence of parasitic infection among primary schoolchildren according to the  
156 education of their mother in Aden, Yemen.

157

### 158 **Distribution of Intestinal Parasites by Age Group**

159 The prevalence of intestinal parasites was higher among children aged >9 years (55.1%)  
160 compared to those aged <9 years (50.0%).

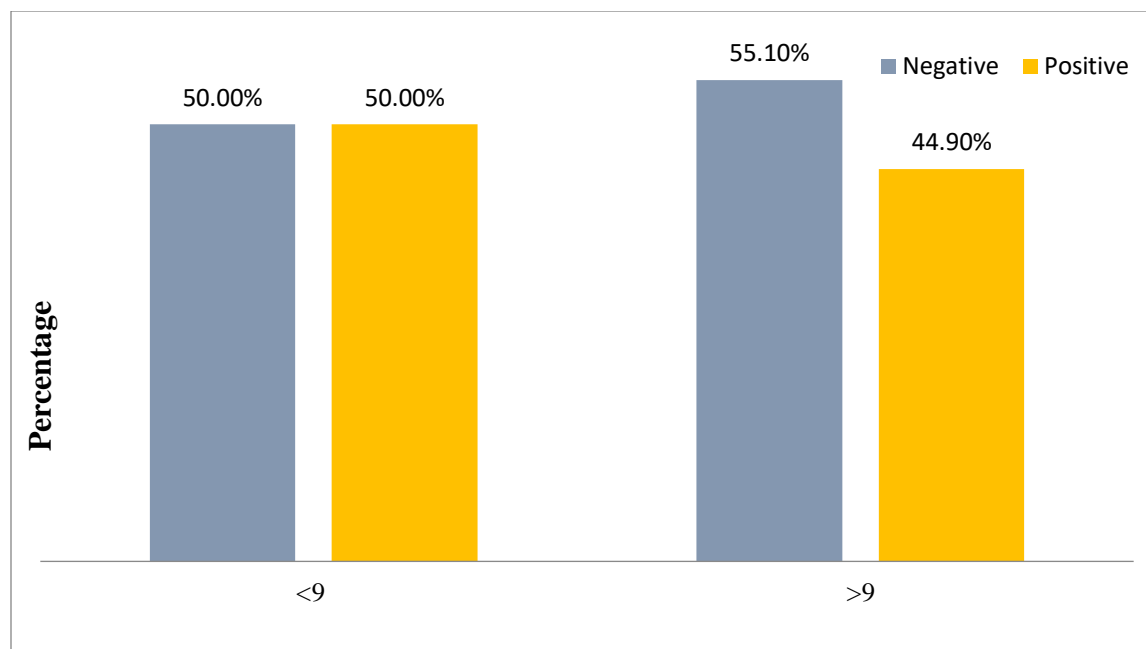

161

162 Figure 7. Prevalence of parasitic infection among primary schoolchildren according to their age  
163 in Aden, Yemen.

#### 164 **Distribution of Intestinal Parasites by Maternal Occupation**

165 The prevalence rates were higher among children whose mothers were housewives (48.5%)  
166 compared to those whose mothers were employed (40.0%).

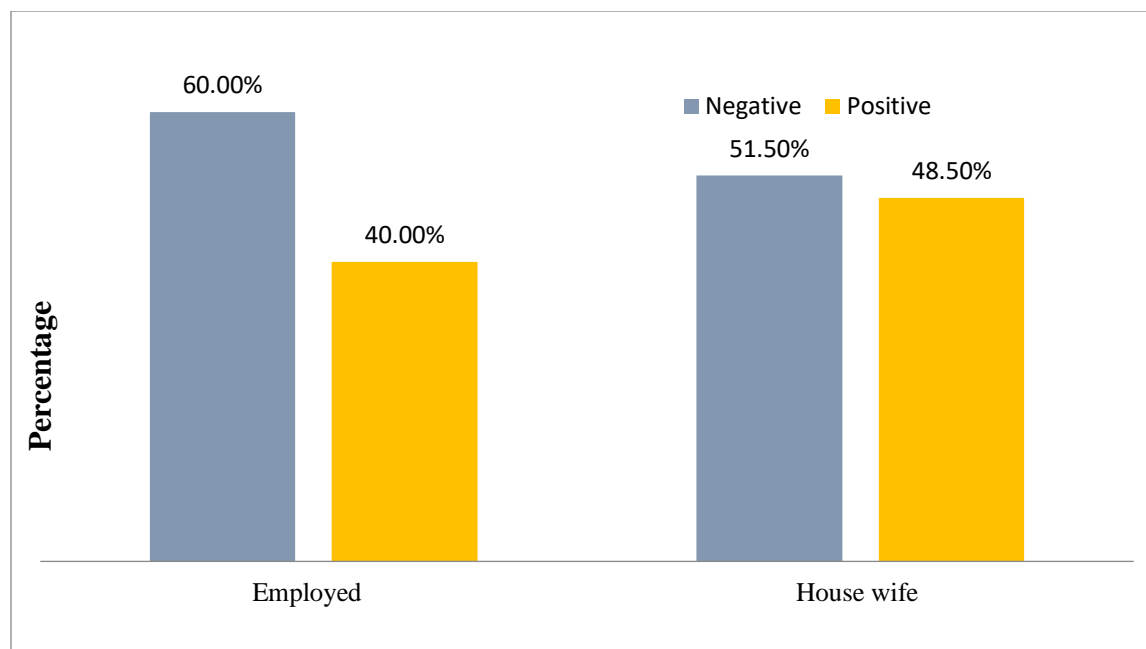

167

168 Figure 8. Prevalence of parasitic infection among primary schoolchildren according to

169 occupation of their mothers in Aden, Yemen.

170 **Risk Factors for Intestinal Parasitic Infections**

171 The analysis of risk factors for contracting intestinal parasitic infections among primary

172 schoolchildren is shown below.

173 Table 2. Risk factors contracting for intestinal parasitic infections among primary schoolchildren

174 in Aden, Yemen.

| Risk Factors             | Number of Children with Positive Response (n) | Infection Positive (%) | P-value |
|--------------------------|-----------------------------------------------|------------------------|---------|
| Hand washing before meal | 188                                           | 90 (47.9%)             | 0.511   |

|                                              |     |            |           |
|----------------------------------------------|-----|------------|-----------|
| Hand washing after meal                      | 197 | 93 (47.2%) | 0.912     |
| Washing anal area with hand after defecation | 201 | 95 (47.3%) | Undefined |
| Nail hygienic status                         | 137 | 64 (46.7%) | 0.820     |

175

## 176 Discussion

177 Our study found that the overall prevalence of intestinal parasitic infections among primary  
178 school children in Aden, Yemen, was 47.3%, with 35.8% having a single parasitic infection and  
179 11.5% having multiple infections. The most predominant parasite identified was *Entamoeba*  
180 *histolytica/dispar*, present in 36.3% of cases. The prevalence was higher among female  
181 schoolchildren (51.2%) compared to males (45.5%). Additionally, the infection rates were  
182 highest among children whose mothers had primary school education (51.3%) and those whose  
183 mothers were housewives (48.5%). Children aged over 9 years had a higher prevalence rate of  
184 50%. There was no significant association between the identified risk factors and intestinal  
185 parasitic infections.

186 Various studies have determined the prevalence of intestinal parasitic infections among primary  
187 schoolchildren globally. Taheri et al. found a similar rate of 47.7% in Iran [11]. A slightly similar  
188 finding was reported as 45.5% in Nigeria [12]. A study conducted in Saudi Arabia reported an  
189 overall prevalence of parasitic infection at 48% [13]. Another study performed in Yemen showed  
190 a prevalence of parasitic infection at 38.2% [5]. Forson et al. reported a rate of 15% in Ghana  
191 [14]. On the other hand, our result was much lower compared to other studies such as in Yemen,

192 which reported prevalences of 51.26%, 57.4%, 61.85%, 66.3%, and 90% [6, 7, 15, 8, 16], North  
193 West Ethiopia at 84.3% [17], Iran at 68.1% [18], and Ethiopia at 51.5% [19]. The difference  
194 might be attributed to geographical differences, the living and socioeconomic nature of the study  
195 subjects, sample size, and the methods used for diagnosis [8].

196 The current study clearly showed that the prevalence of intestinal parasitic infection was higher  
197 in females (51.2%) than males (45.5%) (Figure 2). Simon-Oke et al. also reported that females  
198 had more parasitic infections than males [20]. Other studies conducted in Nepal, Morocco, Saudi  
199 Arabia, Ethiopia, and Yemen reported higher infections among females [21, 13, 22, 23, 8].

200 Conversely, other studies have indicated an opposite finding where the rate was higher among  
201 males, as in Yemen [15, 16], Ethiopia [24, 25], Nigeria [26], and Northwest Ethiopia [27]. This  
202 indicates that sex may play a role in parasitosis depending on the region and other environmental  
203 or behavioral factors [28].

204 The findings of this analytical cross-sectional data showed that *E. histolytica/dispar* was the most  
205 predominant parasite among schoolchildren (36.3%) (Figure 3). Similar findings were shown in  
206 Yemen and Burkina Faso [7, 29, 15, 16]. Lone et al. recorded that the most common detected  
207 parasite was *Ascaris lumbricoides* in India [30]. Other studies conducted in Ghana, Sudan,  
208 Nepal, Yemen, and Iran revealed that *G. lamblia* was the most frequent protozoan infection [14,  
209 31, 32, 8, 11]. A study done in Ethiopia reported that the most prevalent intestinal parasite was  
210 hookworm [17]. *Entamoeba coli* was identified as the most common parasite in a study  
211 undertaken in Egypt [33]. Gelaw et al. found that *Hymenolepis nana* was the most predominant  
212 parasite in Ethiopia [27]. Hailegebriel reported that *Entamoeba histolytica/dispar* and hookworm  
213 were common parasites among children in Ethiopia [34]. Several factors may determine the



214 distribution of parasitic infection among children, including personal hygiene, water sources,  
215 economic status, and parental occupations [32].

216 Out of the 47.3% children positive for intestinal parasites, 35.8% had one parasite, and 11.5%  
217 had multiple parasitic infections (Figure 4). A result from Ghana showed that a single parasite  
218 was found among 13.6% of students while double infections were among 1.3% of students [14].

219 A study performed in Ethiopia reported that multiple infections occurred in 13.5% of  
220 schoolchildren [27]. Edrees et al. showed that 23.5% of children had multiple infections in  
221 Yemen [16].

222 In the current study, protozoan infections were higher than helminths infections (Figure 5).

223 Erismann et al., Gupta et al., and Edrees et al. revealed the same result in Burkina Faso, India,  
224 and Yemen, respectively [29, 32, 16]. Gelaw et al. found that helminthes were higher than  
225 protozoan infections in Ethiopia [27]. The reason for the difference might be the geography of  
226 the place, socioeconomic conditions of the study area, and the hygienic habits of the studied  
227 group [35].

228 This study's results showed the highest prevalence rate of parasitic infection was 51.3% among  
229 children whose mothers had primary school education, followed by 50% among secondary  
230 school educated mothers (Figure 6). Alemu et al. and Sitotaw & Shiferaw showed that the  
231 highest rates were among children whose mothers had primary school education in Ethiopia [24,  
232 23]. Our data disagreed with a study done in Jabel Aweleia Governorate, Khartoum, which  
233 recorded the highest percentage of infected children whose mothers attended Quran school,  
234 followed by those whose mothers were illiterate [36]. Hailegebriel reported that illiterate mothers  
235 were associated with high infection rates among their children in Ethiopia [34]. According to  
236 maternal occupation in the current data, the high prevalence was 48.5% among children whose

237 mothers were housewives (Figure 7). This was in agreement with studies carried out in  
238 Khartoum and Ethiopia [36, 23]. On the other hand, a study conducted in rural Khartoum found  
239 the highest percentage among children whose mothers were unskilled laborers [36]. Differences  
240 may arise from levels of awareness and education among housewife mothers in various  
241 countries. In contrast, the workload of employed mothers, leading to spending valuable time  
242 away from their children, was a risk factor that increased parasitic infections among young  
243 children [37].

244 The results of this study clearly showed that the prevalence of infection was high (50%) in the  
245 age group >9 years (Figure 8). This agreed with studies from Yemen [7, 6]. Sitotaw et al.  
246 detected the highest rate in the age group 2–18 years in Ethiopia [24]. This disagreed with that  
247 reported in Burkina Faso [29]. A study conducted in Morocco showed that the infection rate was  
248 highest among children aged more than 10 years [22]. A study conducted in Nepal showed the  
249 highest rate among children aged less than 6 years [38]. This may be because children in this age  
250 group do not pay much attention to their personal hygiene, wearing protective shoes, and sharing  
251 food using dirty or unclean hands, which exposes them to parasitic infection [3].

252 The main limitation of this study was that the identification of some parasites may have been  
253 missed due to difficulty in using suitable techniques such as cellophane tape for *Enterobius*  
254 *vermicularis* or modified acid-fast stain for intestinal coccidian.

255

## 256 **Conclusions**

257 The prevalence rate of intestinal parasites was found to be higher in Aden, Yemen. The most  
258 dominant parasite was *Entamoeba histolytica/dispar*, with the highest rates among female

259 schoolchildren, children whose mothers were housewives, those with primary and secondary  
260 school education, and children aged >9 years.

### 261 **Data Availability Statement:**

262 All relevant data are within the paper.

### 263 **Author Contributions**

- 264 • **Conceptualization:** Ali N. M. Gubran, Naif Mohammed Al-Haidary
- 265 • **Methodology:** Ali N. M. Gubran
- 266 • **Investigation:** Marwa Faisal M. Bajubair, Afrah Mohsen Ali Algibary, Manal Galeb  
267 Mhmad Ali, Marwa Fuad Othman Ali
- 268 • **Data Curation:** Marwa Faisal M. Bajubair, Afrah Mohsen Ali Algibary, Manal Galeb  
269 Mhmad Ali, Marwa Fuad Othman Ali
- 270 • **Formal Analysis:** Ali N. M. Gubran, Naif Mohammed Al-Haidary
- 271 • **Writing - Original Draft:** Ali N. M. Gubran, Naif Mohammed Al-Haidary
- 272 • **Writing - Review & Editing:** Ali N. M. Gubran, Naif Mohammed Al-Haidary
- 273 • **Supervision:** Ali N. M. Gubran, Naif Mohammed Al-Haidary

274 All authors have reviewed and agreed on their contributions to this manuscript.

275

276

### 277 **References**

- 278 1. Hajare ST, Gobena RK, Chauhan NM, Erniso F. Prevalence of Intestinal Parasite  
279 Infections and Their Associated Factors among Food Handlers Working in Selected  
280 Catering Establishments from Bule Hora, Ethiopia. *Biomed Res Int.*  
281 2021;2021:6669742. doi:10.1155/2021/6669742.
- 282 2. Bisetegn H, Debash H, Ebrahim H, Assefa A, Tadesse A, Teshome M. Prevalence and  
283 Determinant Factors of Intestinal Parasitic Infections and Undernutrition among  
284 Primary School Children in North-Central Ethiopia: A School-Based Cross-Sectional  
285 Study. *J Parasitol Res.* 2023;2023:5750891. doi:10.1155/2023/5750891.
- 286 3. Parija SC, Chaudhury A. Parasite Taxonomy. In: *Parasitic Zoonoses*. Singapore: Springer  
287 Nature Singapore; 2022. p. 3-10. doi:10.1007/978-981-10-7372-3\_1.
- 288 4. Ahmed M. Intestinal Parasitic Infections in 2023. *Gastroenterol Res.* 2023;16(3):127-  
289 140. doi:10.14740/gr1467.
- 290 5. Alharazi T, Bamaga OA, Al-Abd N, Alcantara JC. Intestinal parasitic infection:  
291 prevalence, knowledge, attitude, and practices among schoolchildren in an urban area  
292 of Taiz city, Yemen. *AIMS Public Health.* 2020;7(4):769-777.  
293 doi:10.3934/publichealth.2020059.
- 294 6. Al-Fakih AA, Al-Mekhlafi HM, Al-Eryani SM, Al-Aghbari A. Prevalence and risk  
295 factors of intestinal parasitic infections among schoolchildren in rural Yemen.  
296 *Parasitol Res.* 2022;121(2):679-689. doi:10.1007/s00436-021-07306-1.
- 297 7. Alwabr GM, Al-Moayed EE. Prevalence of intestinal parasitic infections among school  
298 children of Al-Mahweet Governorate, Yemen. *Eur J Biol Res.* 2016;6(2):64-73.  
299 doi:10.5281/zenodo.222126.
- 300 8. Alharazi T. Intestinal Parasitic Infection Among Rural Schoolchildren in Taiz, Yemen:  
301 School-based Assessment of The Prevalence and Associated Risk Factors.  
302 *Helminthologia.* 2022;59(3):233-245. doi:10.2478/helm-2022-0018.
- 303 9. Al-Haddad AM, Baswaid SH. Frequency of intestinal parasitic infection among children  
304 in Hadhramout governorate (Yemen). *J Egypt Soc Parasitol.* 2010;40(2):479-488.  
305 doi:10.12816/0006384.
- 306 10. Alsubaie ASR, Azazy AA, Omer EO, Al-Shibani LA, Al-Mekhlafi AQ, Al-Khawlani  
307 FA. Pattern of parasitic infections as public health problem among school children: A  
308 comparative study between rural and urban areas. *J Taibah Univ Med Sci.*  
309 2016;11(1):13-18. doi:10.1016/j.jtumed.2015.07.003.
- 310 11. Taheri F, Namakin K, Zarban A, Sharifzadeh G. Intestinal parasitic infection among  
311 school children in South Khorasan Province, Iran. *J Res Health Sci.* 2023;11(1):45-  
312 50. doi:10.34172/jrhs.2023.08.
- 313 12. Emeka S. Prevalence of intestinal parasites among school children in Nigeria. *J Parasitol*  
314 *Res.* 2013;2013:575-581. doi:10.1155/2013/575-581.
- 315 13. Al-Malki JS. Prevalence of intestinal parasitic infections among primary school children  
316 in Jeddah, Saudi Arabia. *Saudi Med J.* 2014;35(3):288-296.  
317 doi:10.15537/smj.2014.3.7252.
- 318 14. Forson AO, Arthur I, Ayeh-Kumi PF. The role of family size, employment, and  
319 education of parents in the prevalence of intestinal parasitic infections in school  
320 children in Accra. *PLoS One.* 2017;12(2). doi:10.1371/journal.pone.0172463.
- 321 15. Al-Fakih AA, Al-Mekhlafi HM, Al-Eryani SM, Al-Aghbari A. Prevalence and risk  
322 factors of intestinal parasitic infections among schoolchildren in rural Yemen.  
323 *Parasitol Res.* 2022;121(2):679-689. doi:10.1007/s00436-021-07306-1.

- 324 16. Edrees WH, Al-Mekhlafi HM, Al-Eryani SM, Al-Aghbari A. Intestinal parasitic  
325 infections and associated risk factors among schoolchildren in Al-Mahweet  
326 Governorate, Yemen. *Parasitol Int.* 2022;91:102625.  
327 doi:10.1016/j.parint.2022.102625.
- 328 17. Workneh T, Esmael A, Ayichiluhm M. Prevalence of intestinal parasitic infections and  
329 associated factors among school children in Demba Gofa District, South Ethiopia. *J*  
330 *Parasitol Res.* 2014;2014:210-230. doi:10.1155/2014/210230.
- 331 18. Heidari A, Rokni MB. Prevalence of intestinal parasites among children in day-care  
332 centers in Tehran. *Iran J Public Health.* 2003;32(1):31-35.
- 333 19. Abera B, Alemu A, Yimer M, Yismaw G, Worku A. Epidemiology of soil-transmitted  
334 helminths, *Schistosoma mansoni*, and haematocrit values among schoolchildren in  
335 Ethiopia. *J Infect Public Health.* 2013;6(3):148-156. doi:10.1016/j.jiph.2012.11.005.
- 336 20. Simon-Oke IA, Afolabi OJ. Prevalence of intestinal parasites among primary  
337 schoolchildren in Akure, Ondo State, Nigeria. *Afr J Biomed Res.* 2014;17(2):88-91.  
338 doi:10.4314/ajbr.v17i2.8.
- 339 21. Sah RB, Bhattarai S, Yadav RK, Bhandari D, Chaudhary N. A study of prevalence of  
340 intestinal parasites and associated risk factors among the school children of Itahari,  
341 Eastern Region of Nepal. *Trop Parasitol.* 2013;3(2):140-144. doi:10.4103/2229-  
342 5070.122148.
- 343 22. Messaad S, Mehdi K, Hakkou F, et al. Prevalence of intestinal parasitic infections and  
344 their relation with socio-economic factors among school children in urban and rural  
345 areas in Morocco. *Acta Trop.* 2014;133:84-89. doi:10.1016/j.actatropica.2014.02.011.
- 346 23. Sitotaw B, Shiferaw A. Prevalence of intestinal parasitic infections and associated risk  
347 factors among primary school children in Dangila town, Northwest Ethiopia. *J*  
348 *Parasitol Res.* 2020;2020:8681247. doi:10.1155/2020/8681247.
- 349 24. Alemu G, Alelign D, Abossie A. Prevalence and associated factors of intestinal parasitic  
350 infections among school children of Dagi Primary School, Amhara National Regional  
351 State, Ethiopia. *J Parasitol Res.* 2019;2019:180-186. doi:10.1155/2019/180186.
- 352 25. Sitotaw B, Shiferaw A, Tiruneh M, Diro B, Ayalew G. Intestinal parasitic infections and  
353 nutritional status among school children in Chagni town, Northwest Ethiopia. *J*  
354 *Parasitol Res.* 2019;2019:969-975. doi:10.1155/2019/969975.
- 355 26. Garab I, Simon-Oke I, Ojurongbe O, et al. Parasitic infections among primary school  
356 children in Ondo, Nigeria. *J Paras Dis.* 2014;38(1):138-141. doi:10.1007/s12639-013-  
357 0330-6.
- 358 27. Gelaw A, Anagaw B, Mulu A, Sahlemariam Z, Alem M, Emagnu A, et al. Prevalence of  
359 intestinal parasitic infections and risk factors among schoolchildren at the University  
360 of Gondar Community School, Northwest Ethiopia: a cross-sectional study. *BMC*  
361 *Public Health.* 2013;13:304. doi:10.1186/1471-2458-13-304.
- 362 28. Yeshitila B, Gebremichael T, Aklilu Y, et al. Prevalence and risk factors of intestinal  
363 parasitic infections among primary school children in Bahir Dar town, Northwest  
364 Ethiopia. *Ethiop J Health Dev.* 2020;34(1):1-7.
- 365 29. Erismann S, Knoblauch AM, Diagbouga S, et al. Prevalence and risk factors of helminths  
366 and intestinal protozoa infections among schoolchildren in the Plateau Central and  
367 Centre-Ouest regions of Burkina Faso. *Parasitology International.* 2016;65(4):265-  
368 272. doi:10.1016/j.parint.2016.03.003.

- 369 30. Lone R, Shah A, Lone S, et al. Intestinal parasite infestation in children of Gurez Valley  
370 of Jammu and Kashmir State, India. *J Glob Infect Dis.* 2011;3(4):318-321.  
371 doi:10.4103/0974-777X.91060.
- 372 31. Elameen TA, Bilal NE, Abdellatif MA, et al. Prevalence of intestinal parasitic infections  
373 among schoolchildren in rural and urban areas in Khartoum State, Sudan. *J Infect*  
374 *Public Health.* 2019;12(5):636-641. doi:10.1016/j.jiph.2019.05.003.
- 375 32. Gupta S, Yadav S, Yadav D, et al. Intestinal parasitic infections and their association with  
376 socioeconomic factors and hygienic habits among school children in North India. *J*  
377 *Family Med Prim Care.* 2020;9(9):4562-4566. doi:10.4103/jfmpc.jfmpc\_1176\_20.
- 378 33. Ibrahim FA. Prevalence of intestinal parasites among school children in northern  
379 districts of Giza governorate, Egypt. *J Egypt Soc Parasitol.* 2011;41(1):163-172.
- 380 34. Hailegebriel T. Prevalence of intestinal parasitic infections and associated risk factors  
381 among schoolchildren in Kola Diba, North Gondar, Ethiopia. *J Parasitol Res.*  
382 2017;2017:2750749. doi:10.1155/2017/2750749.
- 383 35. Wasihun AG, Dejene TA, Mekonen SA, et al. Intestinal parasitic infections and  
384 associated factors among primary schoolchildren in Asmara, Eritrea. *BMC Public*  
385 *Health.* 2020;20:1150. doi:10.1186/s12889-020-09239-1.
- 386 36. Ismail AM. Prevalence of intestinal parasitic infections and their association with  
387 nutritional status among primary schoolchildren in Jabel Aulia Locality, Khartoum  
388 State, Sudan. *J Egypt Soc Parasitol.* 2005;35(1):1-10.
- 389 37. Quihui L, Valencia ME, Crompton DW, et al. Role of the employment status and  
390 education of mothers in the prevalence of intestinal parasitic infections in Mexican  
391 rural schoolchildren. *BMC Public Health.* 2006;6:225. doi:10.1186/1471-2458-6-225.
- 392 38. Pradhan P, Rai BK, Lekhak B, et al. Prevalence of intestinal parasitic infections among  
393 schoolchildren in Kathmandu Valley. *Nepal Med Coll J.* 2014;16(1):118-122.
- 394 39. Chiojioke CC, Okon OE, Etim SE, et al. Prevalence of intestinal parasitic infections  
395 among primary schoolchildren in a rural community in Imo State, Nigeria. *J Rural*  
396 *Trop Public Health.* 2004;3:64-67.
